# Supplementary material for: Habitat‐adapted microbial communities mediate Sphagnum peatmoss resilience to warming
Source: PubMed Central journal article supplement — New Phytol. 2022 Mar 28;234(6):2111–25. doi: 10.1111/nph.18072 (PMC9310625; doi:10.1111/nph.18072), 2022-03-28
Supplement: NPH-234-2111-s002.pdf [file NPH-234-2111-s002.pdf]

## ***New Phytologist* Supporting Information**

Article title: Habitat-adapted microbial communities mediate *Sphagnum* peatmoss resilience to warming

Authors: Alyssa A. Carrell, Travis J. Lawrence, Kristine Grace M. Cabugao, Dana L. Carper, Dale A. Pelletier, Jun Hyung Lee, Sara Jawdy, Jane Grimwood, Jeremy Schmutz, Paul J. Hanson, A. Jonathan Shaw, David J. Weston

Article acceptance date: 21 February 2022

**The following Supporting Information is available for this article:**

**Fig. S1** Average moss fluorescence in 2016 at the end of the experiment.

**Fig. S2** Average moss fluorescence in 2017 at the end of the experiment.

**Fig. S3** Average moss growth rate under ambient or warming treatments.

**Fig. S4** Bacterial/archaeal amplicon Non-metric multidimensional scaling (NMDS) ordination of the Bray-Curtis distance matrix of inoculum and field

**Fig. S5** Bacterial/archaeal amplicon Non-metric multidimensional scaling (NMDS) ordination of the Bray-Curtis distance matrix of samples at the end of the experiment.

**Fig. S6** Linear correlation of plant growth rate and fungal (ITS) Shannon diversity at the conclusion of the experiment.

**Fig. S7** Boxplot of percent of metatranscriptomic reads mapping to *Sphagnum*, metagenome assembly and metagenome assembled genomes .

**Fig. S8** MDS of the top 500 most variable microbial SEED level 3 categories.

**Table S1** Incubation temperature and light cycle for 2016 and 2017 laboratory experiments.

**Table S2** Summary growth rate and total moss growth over 4 weeks.

**Table S3** Two-way ANOVA tables of total moss growth.

**Table S4** Percent change of total moss growth between microbiome transfers.

**Table S5** Two-way ANOVA tables of moss fluorescence (Fv/Fm).

**Table S6** Percent change of fluorescence at harvest.

**Table S7** Number of paired-end bacterial/archaeal amplicon reads.

**Table S8** Bacterial/archaeal amplicon-based community abundance of starting inoculum.

**Table S9** Bacterial/archaeal amplicon-based community abundance at the end of lab incubations.

**Table S10** Fungal amplicon (ITS) phylum level taxonomy of microbiomes at the end of the laboratory experiment.

**Table S11** Fungal (ITS) class level taxonomy of microbiomes at the end of the laboratory experiment.

**Table S12** Descriptive statistics and log2 fold change of metagenome assembled genomes (MAG).

**Table S13** Number of paired-end metatranscriptomic reads passing quality control.

**Table S14** Log2 fold change of SEED subsystem level 3 gene ontologies for the microbial fraction of metatranscriptomic reads.

**Methods S1** Metagenome sequencing and analysis.

**Available as separate file:**

**Dataset S1** Log fold change (LFC) of RNA-seq profiles from plants with ambient- and warm-microbiomes across temperature treatments.

**Dataset S2** Log fold change (LFC) of RNA-seq profiles from plant-microbiomes with ambient and warming microbiomes treatments.

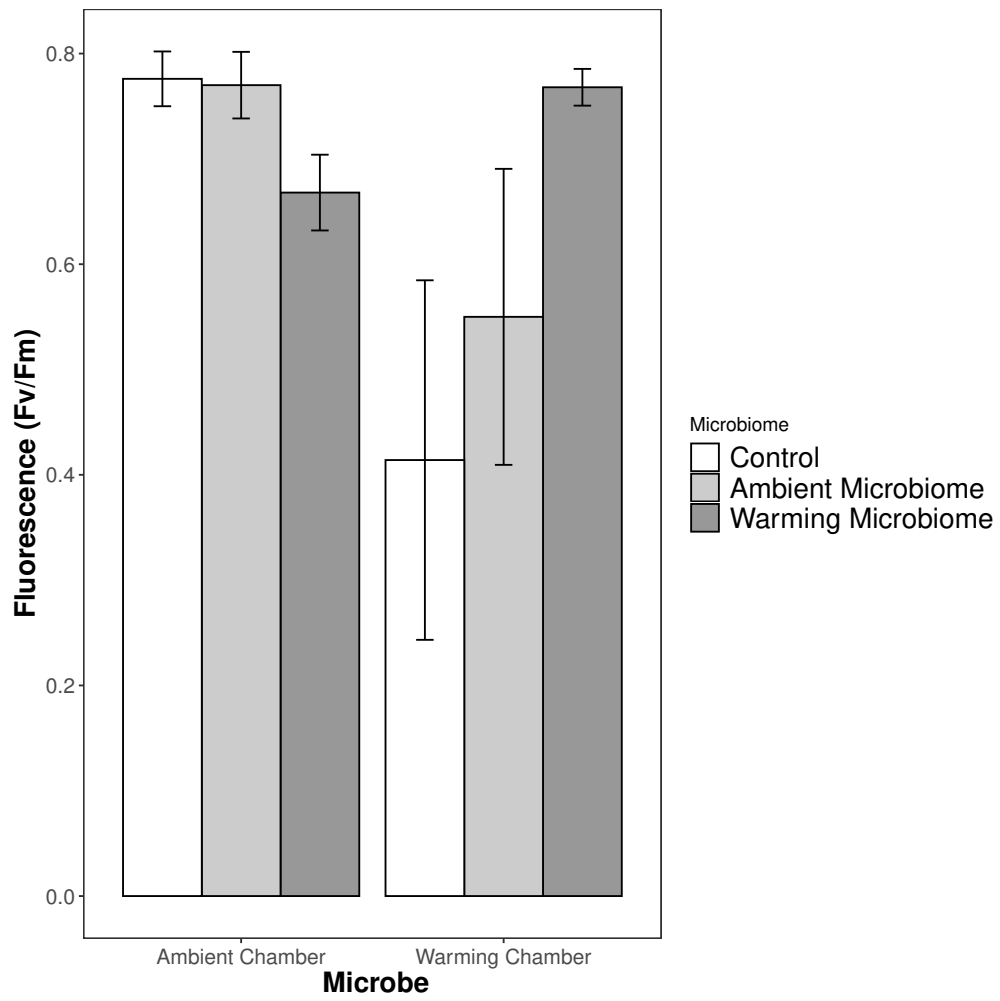

**Fig. S1.** Average moss fluorescence in 2016 at the end of the experiment with error bars representing standard error of the mean.

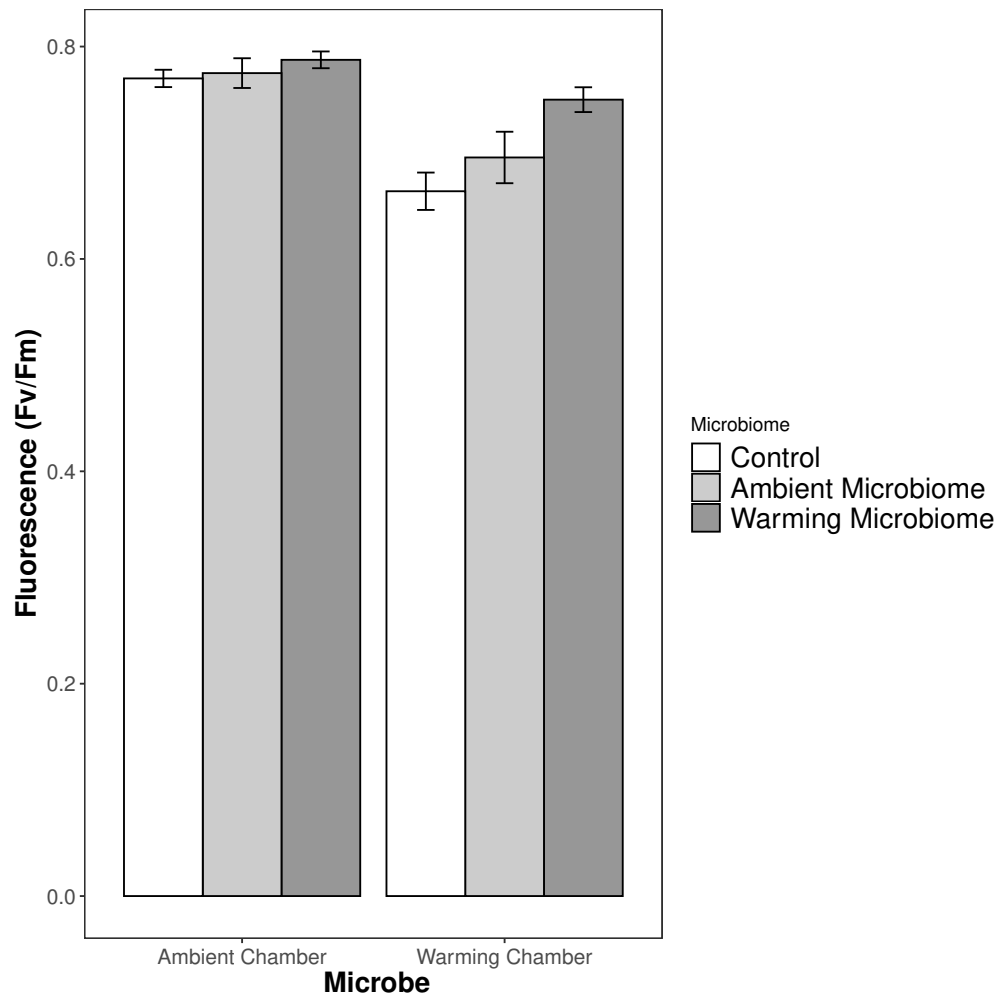

Fig. S2. Average moss fluorescence in 2017 at the end of the experiment with error bars representing standard error of the mean.

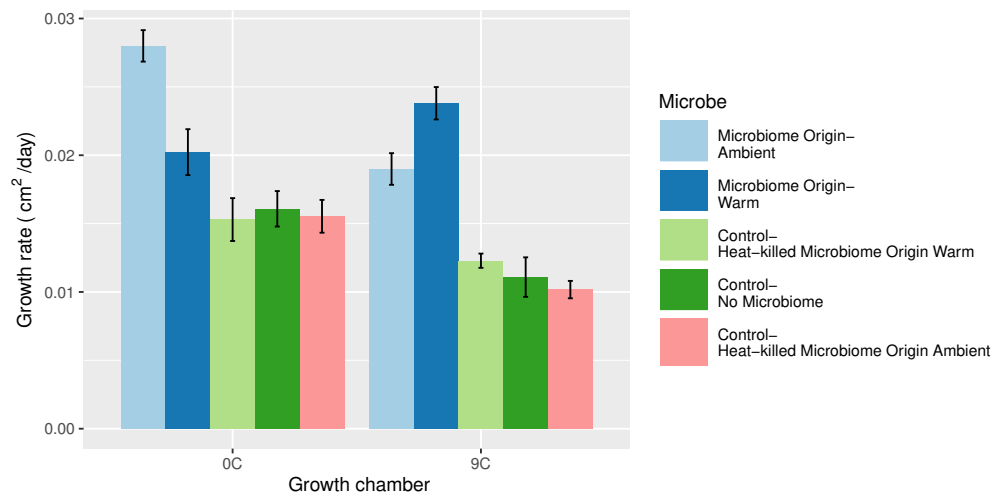

**Fig. S3.** Thermally conditioned intact microbiomes confer thermotolerance in host plant. No microbial controls, heat-killed controls and microbial inoculums of thermally conditioned microbiomes from glycerol stocks were applied to axenic Sphagnum before incubation in ambient or warming temperatures. Average moss growth rate under ambient or warming treatments was measured after 4 weeks. Error bars represent standard error of the mean.

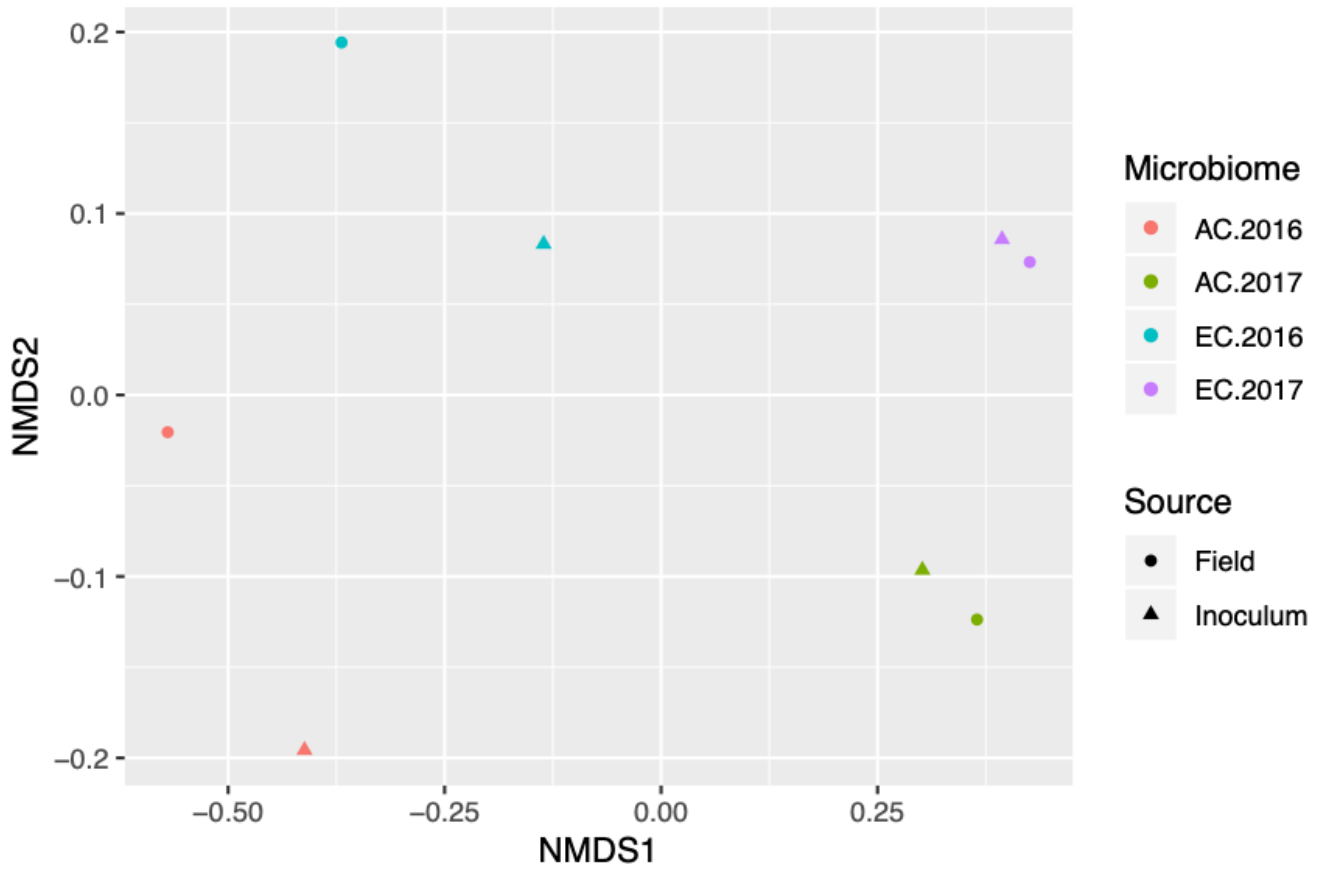

**Fig. S4.** Non-metric multidimensional scaling (NMDS) ordination of the Bray-Curtis distance matrix of SSU rRNA gene sequences rarefied to 19000 reads per sample. Points that are closer together on the ordination have communities that are more similar. Each point corresponds to a sample, color corresponds to the ambient (AC) and elevated (EC) SPRUCE enclosures and the year of collection, and shapes correspond to Sphagnum microbiomes from the SPRUCE site directly from field samples (field) or after the microbiomes were isolated from the field samples to be used as starting inoculum for incubation experiments in the laboratory.

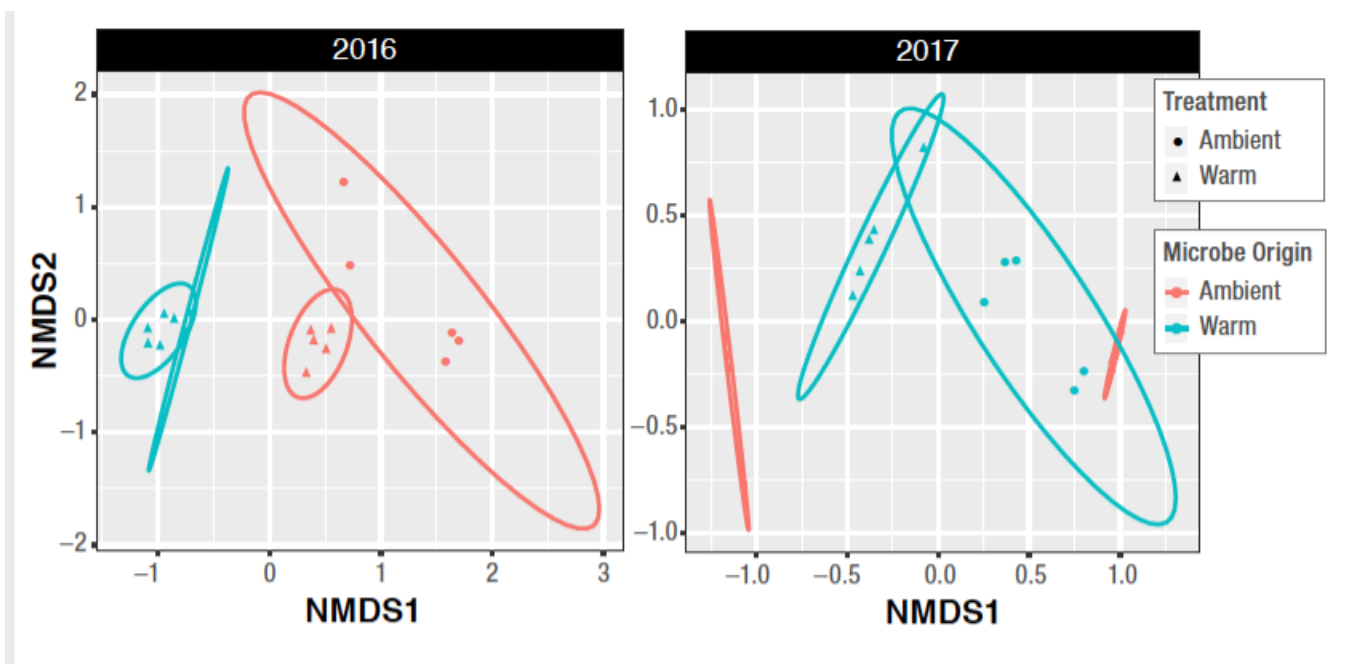

**Fig. S5.** Non-metric multidimensional scaling (NMDS) ordination of the microbiome Bray-Curtis distance matrix. Points that are closer together on the ordination have communities that are more similar. Each point corresponds to a sample, color corresponds to the microbiome thermal origin from ambient and warm field plots. Shapes correspond to the chamber that axenic plants were incubated at ambient or warm temperatures.

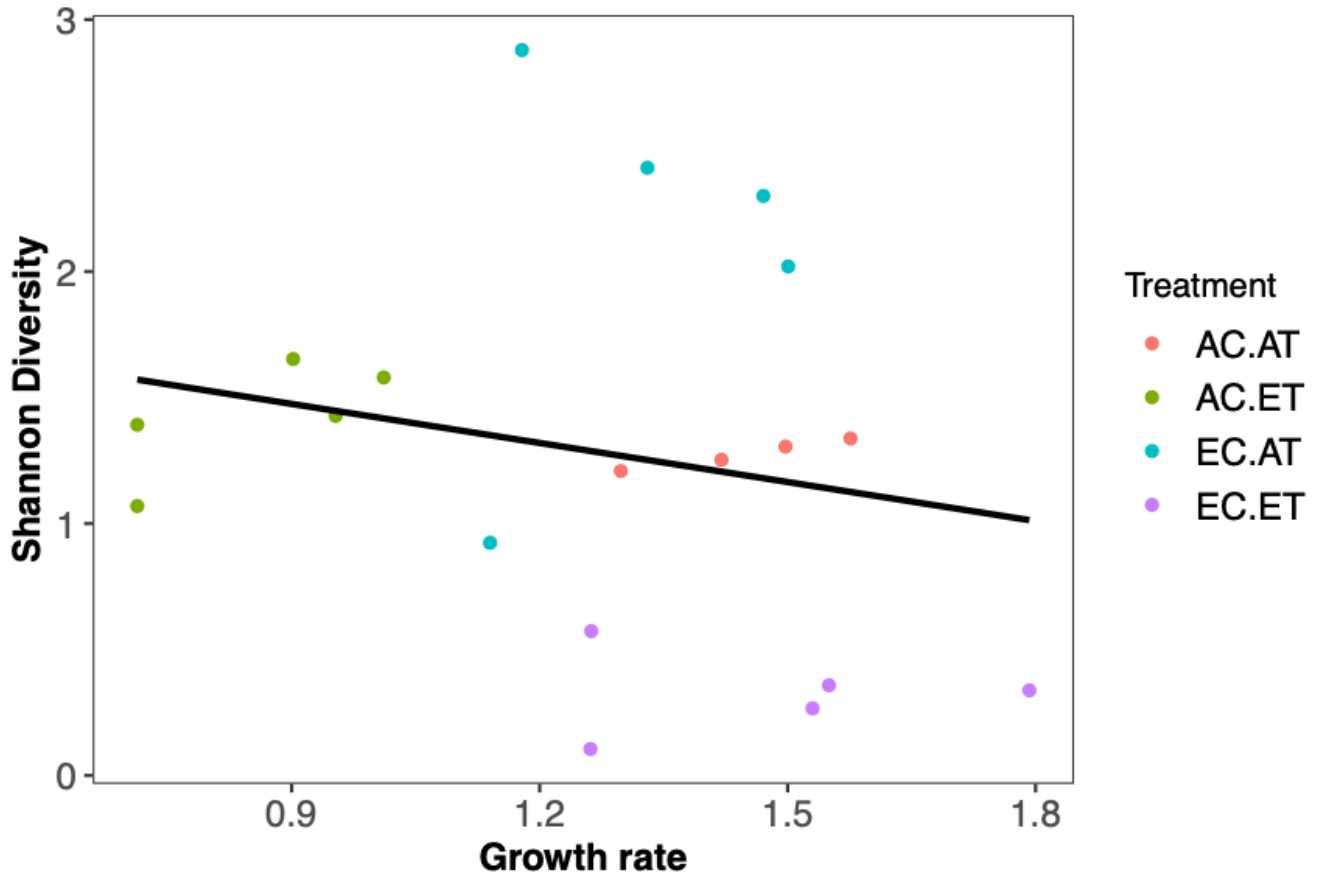

**Fig. S6.** Linear correlation of plant growth rate and fungal (ITS) Shannon diversity at the conclusion of the experiment. Each point corresponds to a sample with colors indicating ambient chamber/ambient microbiome (AC.AT), ambient chamber/warming microbiome (EC.AT), warming chamber/ambient microbiome (AC.ET), or warming chamber/warming microbiome (EC.ET).



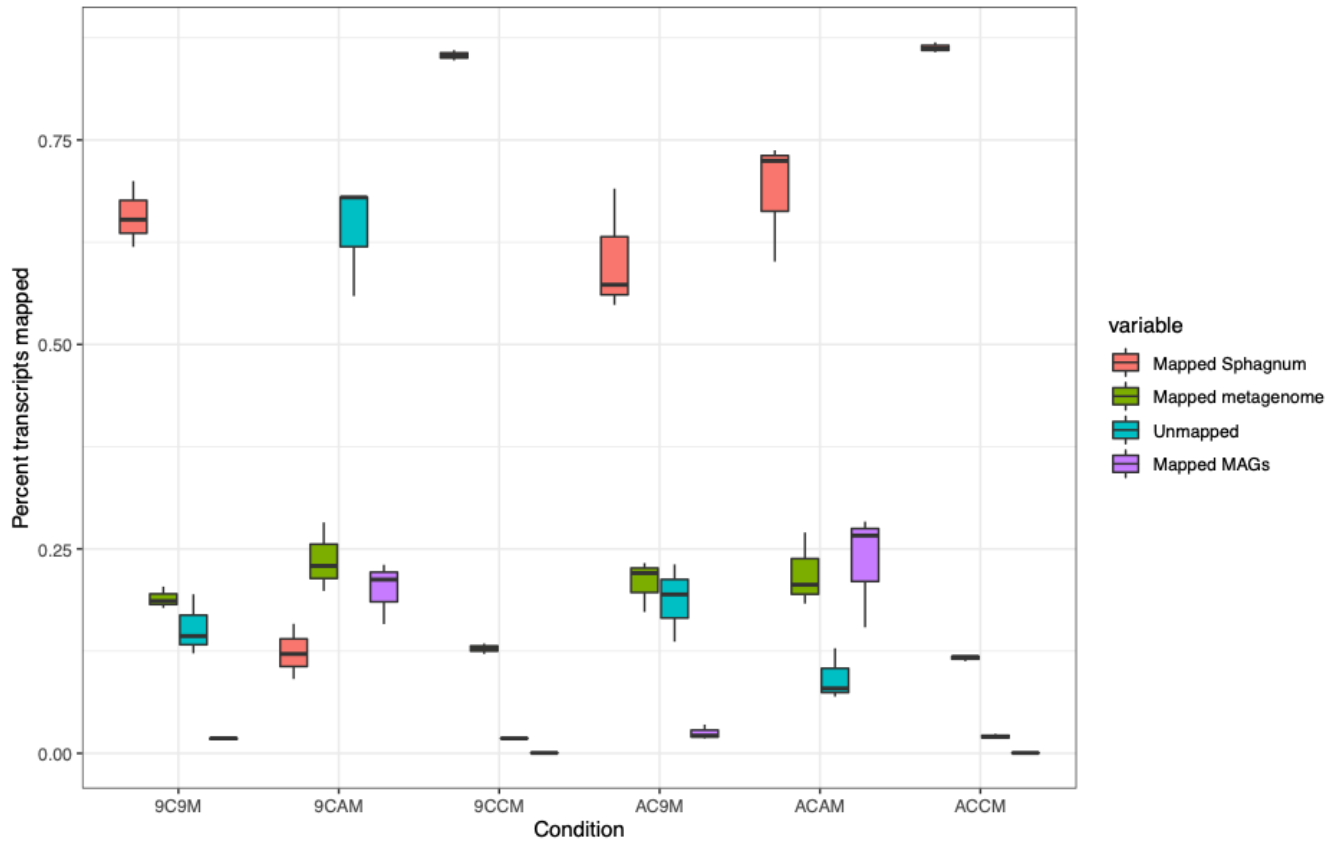

**Fig. S7.** Boxplot of percent of metatranscriptomic reads mapping to *Sphagnum fallax* (red), metagenome assembly, and metagenome assembled genomes (purple), or not mapping (blue) for ambient chamber/ambient microbiome (ACAM), ambient chamber/warming microbiome (AC9M), warming chamber/ambient microbiome (9CAM), warming chamber/warming microbiome (9C9M), ambient chamber/no microbiome addition (ACCM), and warming chamber/no microbiome addition (9CCM). Boxes span from the first to the third quartile, black bar indicates median, and whiskers span  $1.5 \times$  interquartile range.

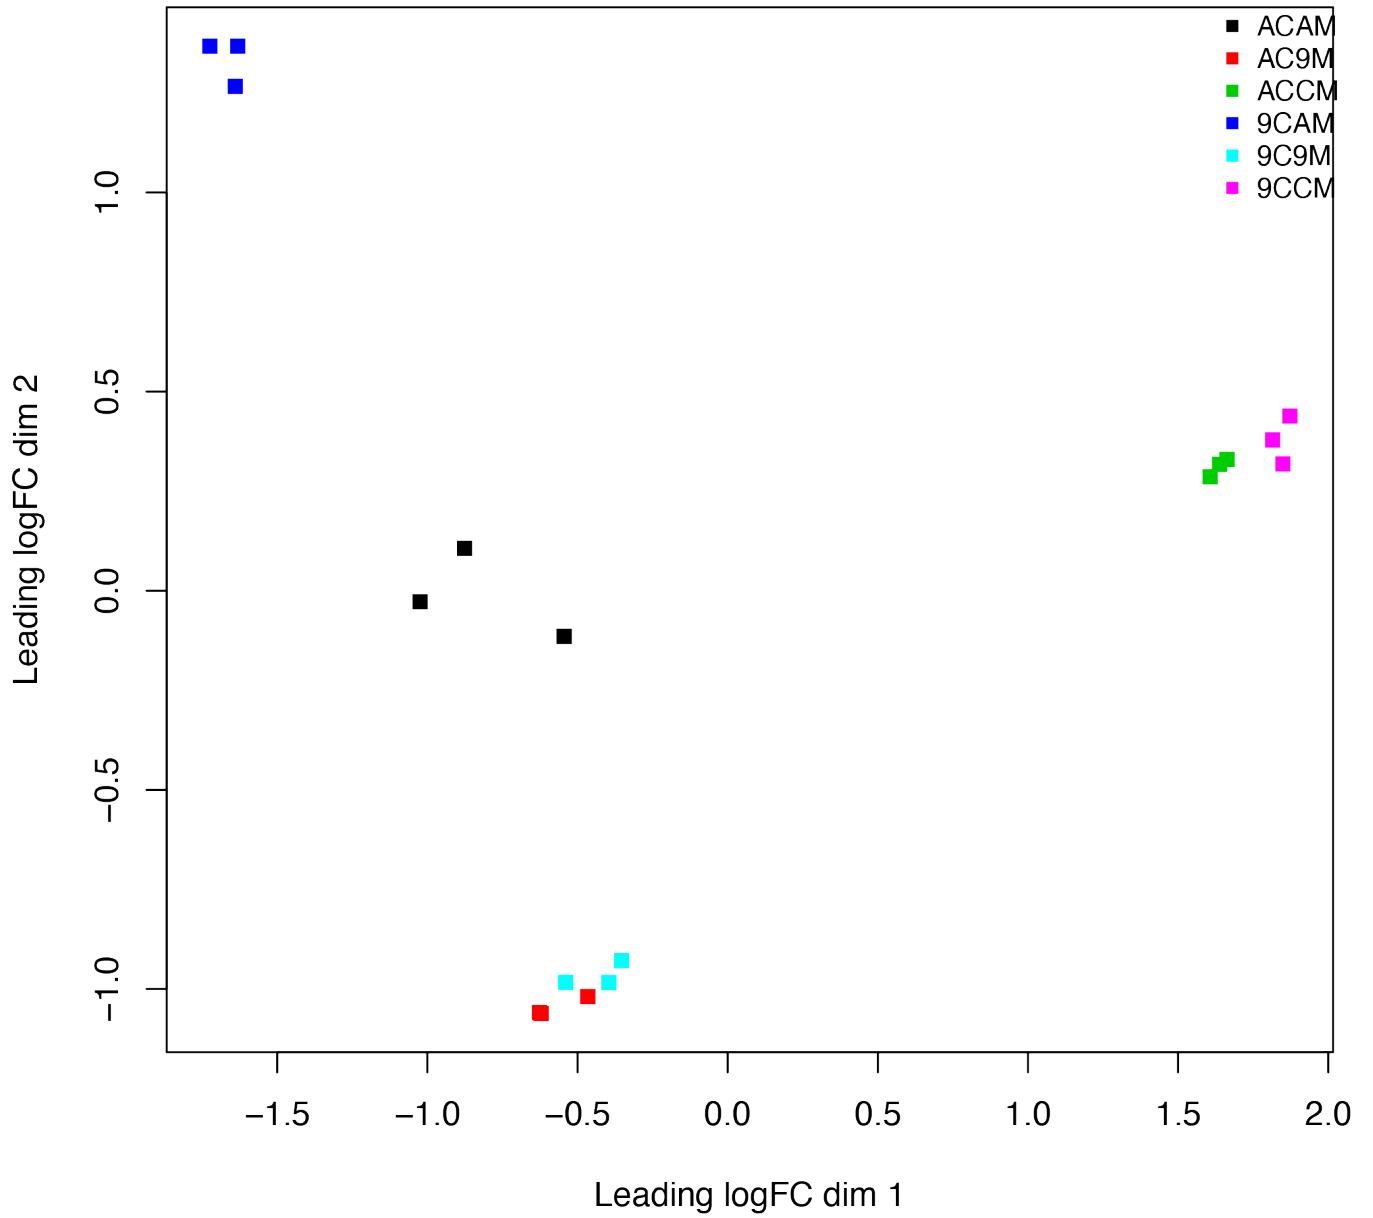

Fig. S8. MDS based on the top 500 most variable SEED level 3 categories of the microbial partition of the metatranscriptome. Abbreviations are defined in Fig. S6

**Table S1. Incubation temperature and light cycle for 2016 and 2017 laboratory experiments. Temperatures were determined from June 2016 average temperature for 6 hour blocks at the SPRUCE site.**

| Treatment Chamber | Time  | Temperature (C) | Light |
|-------------------|-------|-----------------|-------|
| Ambient +0C       | 0:00  | 13              | No    |
|                   | 6:00  | 18              | Yes   |
|                   | 12:00 | 21              | Yes   |
|                   | 18:00 | 15              | No    |
| Ambient +9C       | 0:00  | 22              | No    |
|                   | 6:00  | 27              | Yes   |
|                   | 12:00 | 30              | Yes   |
|                   | 18:00 | 24              | No    |

**Table S2. Summary growth rate and total moss growth over 4 weeks.**

| Year | Chamber | Microbiome origin | N  | Mean growth rate (mm/day) | SD growth rate | SE growth rate | Mean growth (mm) | SD growth | SE growth |
|------|---------|-------------------|----|---------------------------|----------------|----------------|------------------|-----------|-----------|
| 2016 | Ambient | Ambient           | 6  | 1.664                     | 0.448          | 0.200          | 46.601           | 12.534    | 5.605     |
|      | Ambient | Control           | 6  | 1.060                     | 0.718          | 0.321          | 29.687           | 20.104    | 8.991     |
|      | Ambient | Warming           | 6  | 1.098                     | 0.786          | 0.352          | 30.736           | 22.017    | 9.846     |
|      | Warming | Ambient           | 6  | 0.887                     | 0.569          | 0.255          | 24.849           | 15.936    | 7.127     |
|      | Warming | Control           | 6  | 0.202                     | 0.202          | 0.090          | 5.645            | 5.645     | 2.525     |
|      | Warming | Warming           | 6  | 1.759                     | 0.418          | 0.187          | 49.251           | 11.692    | 5.229     |
| 2017 | Ambient | Ambient           | 12 | 1.407                     | 0.288          | 0.083          | 29.548           | 6.057     | 1.749     |
|      | Ambient | Control           | 12 | 1.088                     | 0.117          | 0.034          | 22.844           | 2.455     | 0.709     |
|      | Ambient | Warming           | 12 | 1.311                     | 0.186          | 0.054          | 27.537           | 3.906     | 1.128     |
|      | Warming | Ambient           | 12 | 0.593                     | 0.455          | 0.131          | 12.455           | 9.564     | 2.761     |
|      | Warming | Control           | 12 | 0.188                     | 0.179          | 0.052          | 3.948            | 3.758     | 1.085     |
|      | Warming | Warming           | 12 | 1.460                     | 0.170          | 0.049          | 30.662           | 3.563     | 1.028     |

**Table S3. Two-way ANOVA tables of total moss growth. Data were ranked transformed prior to analysis. Chamber refers to the experimental temperature treatment.**

|                    | Sum of Squares | DF | F-value | P-value |
|--------------------|----------------|----|---------|---------|
| <b>2016</b>        |                |    |         |         |
| Intercept          | 2420.00        | 1  | 53.226  | <0.05   |
| Chamber            | 211.60         | 1  | 4.654   | <0.05   |
| Microbe            | 170.53         | 2  | 1.875   | 0.175   |
| Chamber:Microbiome | 516.47         | 2  | 5.680   | <0.05   |
| Residuals          | 1091.20        | 24 |         |         |
| <b>2017</b>        |                |    |         |         |
| Intercept          | 32865          | 1  | 308.448 | <0.05   |
| Chamber            | 7633           | 1  | 71.634  | <0.05   |
| Microbe            | 2477           | 2  | 11.621  | <0.05   |
| Chamber:Microbiome | 6823           | 2  | 32.016  | <0.05   |
| Residuals          | 7032           | 66 |         |         |

**Table S4. Percent change of total moss growth between microbiome transfers relative to moss without a microbiome within the same chamber calculated as: (treatment microbiome – no microbiome)/no microbiome. Non-significant comparisons are indicated with 'ns'.**

| Year | Chamber | Microbiome | Percent change | p-value |
|------|---------|------------|----------------|---------|
| 2016 | Ambient | Ambient    | 36%            | ns      |
|      | Ambient | Warming    | 3%             | ns      |
|      | Warming | Ambient    | 77%            | ns      |
|      | Warming | Warming    | 89%            | <0.05   |
| 2017 | Ambient | Ambient    | 23%            | <0.05   |
|      | Ambient | Warming    | 17%            | <0.05   |
|      | Warming | Ambient    | 68%            | ns      |
|      | Warming | Warming    | 87%            | <0.05   |

**Table S5. Two-way ANOVA tables of moss fluorescence (Fv/Fm). Data were ranked transformed prior to analysis. Chamber refers to the experimental temperature treatment.**

|                    | Sum of squares | DF | F-value | P-value |
|--------------------|----------------|----|---------|---------|
| <b>2016</b>        |                |    |         |         |
| Intercept          | 2000.00        | 1  | 37.433  | <0.05   |
| Chamber            | 225.62         | 1  | 4.223   | 0.051   |
| Microbe            | 352.43         | 2  | 3.298   | 0.054   |
| Chamber:Microbiome | 822.02         | 2  | 7.693   | <0.05   |
| Residuals          | 1282.30        | 24 |         |         |
| <b>2017</b>        |                |    |         |         |
| Intercept          | 17328.0        | 1  | 40.135  | <0.05   |
| Chamber            | 222.0          | 1  | 0.514   | 0.476   |
| Microbe-Origin     | 577.8          | 2  | 0.669   | 0.516   |
| Chamber:Microbiome | 328.8          | 2  | 0.381   | 0.685   |
| Residuals          | 28494.8        | 66 |         |         |

**Table S6. Percent change of fluorescence at harvest between microbiome transfers relative to moss without a microbiome within the same chamber calculated as: (treatment microbiome – no microbiome)/no microbiome. Non-significant comparisons are indicated with 'ns'.**

| Year | Chamber | Microbiome | Percent change | p-value |
|------|---------|------------|----------------|---------|
| 2016 | Ambient | Ambient    | -0.78%         | ns      |
|      | Ambient | Warming    | -16.17%        | ns      |
|      | Warming | Ambient    | 24.73%         | ns      |
|      | Warming | Warming    | 46.09%         | ns      |
| 2017 | Ambient | Ambient    | 0.65%          | ns      |
|      | Ambient | Warming    | 2.28%          | ns      |
|      | Warming | Ambient    | 4.59%          | ns      |
|      | Warming | Warming    | 11.47%         | ns      |



**Table S7. Number of paired-end amplicon reads after quality filtering and removal of plastid DNA.**

| Year    | Chamber | Microbiome | Rep    | Read   |
|---------|---------|------------|--------|--------|
| 2016    | Ambient | Ambient    | 1      | 28141  |
|         |         |            | 2      | 25327  |
|         |         |            | 3      | 19666  |
|         |         |            | 4      | 55905  |
|         |         |            | 5      | 40527  |
|         | Ambient | Warming    | 1      | 27700  |
|         |         |            | 2      | 36244  |
|         |         |            | 3      | 53569  |
|         |         |            | 4      | 45765  |
|         |         |            | 5      | 48325  |
|         | Warming | Ambient    | 1      | 42631  |
|         |         |            | 2      | 31655  |
|         |         |            | 3      | 67278  |
|         |         |            | 4      | 40788  |
|         |         |            | 5      | 83227  |
| Warming | Warming | 1          | 48319  |        |
|         |         | 2          | 41081  |        |
|         |         | 3          | 42373  |        |
|         |         | 4          | 84018  |        |
|         |         | 5          | 23128  |        |
| 2017    | Ambient | Ambient    | 1      | 165122 |
|         |         |            | 2      | 97861  |
|         |         |            | 3      | 109430 |
|         |         |            | 4      | 73358  |
|         |         |            | 5      | 74235  |
|         | Ambient | Warming    | 1      | 229026 |
|         |         |            | 2      | 111912 |
|         |         |            | 3      | 187135 |
|         |         |            | 4      | 202455 |
|         |         |            | 5      | 173016 |
|         | Warming | Ambient    | 1      | 98447  |
|         |         |            | 2      | 95805  |
|         |         |            | 3      | 95300  |
|         |         |            | 4      | 92978  |
|         |         |            | 5      | 142548 |
| Warming | Warming | 1          | 90474  |        |
|         |         | 2          | 95494  |        |
|         |         | 3          | 150805 |        |
|         |         | 4          | 120406 |        |
|         |         | 5          | 62401  |        |

**Table S8. Bacterial/archaeal amplicon-based community abundance table for starting inoculums isolated from the ambient (AC) and warming (EC) SPRUCE enclosures and the year of collection. Bacterial classes not detected in samples are indicated with 'NA'.**

| Class                  | AC.2016 | AC.2017 | EC.2016 | EC.2017 |
|------------------------|---------|---------|---------|---------|
| c__[Fimbriimonadia]    | NA      | 0.0048  | NA      | 0.0044  |
| c__[Methylacidiphilae] | 0.0067  | 0.0422  | NA      | 0.0175  |
| c__[Pedosphaerae]      | 0.017   | 0.0644  | 0.0059  | 0.0463  |
| c__[Saprospirae]       | 0.0227  | 0.0447  | 0.0441  | 0.0329  |
| c__[Spartobacteria]    | 0.0044  | 0.0303  | 0.0011  | 0.018   |
| c__4C0d-2              | 0.0015  | 0.0058  | NA      | 0.0026  |
| c__Acidimicrobiia      | 0.0049  | 0.0065  | NA      | 0.0066  |
| c__Acidobacteriia      | 0.124   | 0.1127  | 0.0641  | 0.1329  |
| c__Actinobacteria      | 0.0168  | 0.0093  | 0.0039  | 0.0035  |
| c__Alphaproteobacteria | 0.3211  | 0.2954  | 0.0805  | 0.3033  |
| c__Armatimonadia       | NA      | 0.0031  | NA      | 0.0033  |
| c__Bacilli             | NA      | NA      | 0.0151  | NA      |
| c__Bacteroidia         | 0.008   | NA      | 0.0016  | NA      |
| c__Betaproteobacteria  | 0.0642  | 0.0562  | 0.1706  | 0.0803  |
| c__Chlamydiia          | 0.0141  | 0.0082  | 0.0047  | 0.0107  |
| c__Chthonomonadetes    | NA      | 0.0031  | NA      | 0.0061  |
| c__Clostridia          | 0.1609  | NA      | 0.0654  | NA      |
| c__Coriobacteriia      | 0.0018  | NA      | NA      | NA      |
| c__Cytophagia          | NA      | 0.0018  | NA      | 0.0047  |
| c__Deltaproteobacteria | 0.0057  | 0.0272  | 0.0014  | 0.0192  |
| c__Elusimicrobia       | 0.0018  | 0.0014  | NA      | 0.0015  |
| c__Flavobacteriia      | NA      | NA      | 0.0013  | 0.0014  |
| c__Gammaproteobacteria | 0.103   | 0.1115  | 0.4248  | 0.1448  |
| c__Holophagae          | NA      | NA      | 0.0259  | NA      |
| c__Methanobacteria     | 0.0421  | NA      | 0.0088  | NA      |
| c__Methanomicrobia     | 0.0014  | NA      | NA      | NA      |
| c__Nostocophycideae    | 0.0053  | 0.0189  | NA      | 0.0173  |
| c__Opitutae            | 0.0111  | 0.0127  | 0.0019  | 0.0087  |
| c__Phycisphaerae       | 0.0037  | 0.0232  | NA      | 0.015   |
| c__Planctomycetia      | 0.0076  | 0.02    | NA      | 0.0233  |
| c__SBRH58              | NA      | 0.001   | NA      | NA      |
| c__SJA-4               | 0.0011  | 0.0022  | NA      | 0.0011  |
| c__Solibacteres        | 0.0109  | 0.0237  | NA      | 0.047   |
| c__Sphingobacteriia    | 0.0267  | 0.0531  | 0.0722  | 0.0377  |
| c__Thermoleophila      | 0.0025  | 0.0048  | NA      | 0.0027  |
| c__Thermoplasmata      | 0.0019  | NA      | NA      | NA      |
| c__TM7-1               | NA      | 0.0016  | NA      | NA      |
| c__vadinHA49           | NA      | 0.0017  | NA      | NA      |
| c__Verrucomicrobiae    | NA      | 0.002   | NA      | 0.0013  |
| c__ZB2                 | NA      | 0.0011  | NA      | NA      |
| Other                  | 0.007   | 0.0054  | 0.0066  | 0.0062  |

**Table S9. Bacterial/archaeal amplicon-based community abundance table for samples at the end of the experiment for the ambient chamber/ambient microbiome (AC.AT), ambient chamber/warming microbiome (EC.AT), warming chamber/ambient microbiome (AC.ET), and warming chamber/warming microbiome (EC.ET). Bacterial classes not detected in samples are indicated with 'NA'.**

| Class                    | Year  |       | 2016  |       |       |       | 2017  |       |  |  |
|--------------------------|-------|-------|-------|-------|-------|-------|-------|-------|--|--|
|                          | AC.AT | AC.ET | EC.AT | EC.ET | AC.AT | AC.ET | EC.AT | EC.ET |  |  |
| c__[Methylacidiphilae]   | NA    | NA    | 0.024 | NA    | 0.028 | NA    | NA    | NA    |  |  |
| c__[Pedosphaerae]        | 0.083 | 0.025 | 0.032 | 0.024 | 0.043 | NA    | NA    | NA    |  |  |
| c__[Saprospirae]         | 0.024 | 0.094 | 0.083 | NA    | 0.071 | 0.261 | 0.316 | 0.19  |  |  |
| c__[Spartobacteria]      | 0.026 | 0.211 | 0.086 | NA    | 0.053 | NA    | NA    | 0.026 |  |  |
| c__Acidobacteriia        | 0.089 | 0.066 | 0.104 | 0.055 | 0.074 | NA    | NA    | NA    |  |  |
| c__Actinobacteria        | NA    | NA    | NA    | NA    | 0.026 | NA    | NA    | NA    |  |  |
| c__Alphaproteobacteria   | 0.288 | 0.189 | 0.185 | 0.221 | 0.256 | 0.146 | 0.159 | 0.258 |  |  |
| c__Betaproteobacteria    | 0.111 | 0.202 | 0.229 | 0.339 | 0.105 | 0.049 | 0.153 | 0.116 |  |  |
| c__Clostridia            | 0.089 | NA    | NA    | 0.119 | NA    | NA    | NA    | NA    |  |  |
| c__Deltaproteobacteria   | NA    | NA    | NA    | NA    | 0.021 | NA    | 0.036 | 0.021 |  |  |
| c__Flavobacteriia        | NA    | NA    | NA    | NA    | NA    | 0.07  | 0.074 | NA    |  |  |
| c__Gammaproteobacteria   | 0.091 | 0.046 | 0.059 | 0.052 | 0.071 | NA    | 0.034 | 0.097 |  |  |
| c__Methanobacteria       | 0.023 | NA    | NA    | 0.03  | NA    | NA    | NA    | NA    |  |  |
| c__Nostocophycideae      | NA    | NA    | NA    | NA    | 0.136 | NA    | NA    | NA    |  |  |
| c__Opitutae              | 0.027 | NA    | NA    | NA    | NA    | NA    | NA    | 0.054 |  |  |
| c__SJA-4                 | NA    | NA    | NA    | NA    | 0.024 | NA    | NA    | NA    |  |  |
| c__Solibacteres          | NA    | 0.029 | 0.021 | NA    | NA    | NA    | NA    | 0.063 |  |  |
| c__Sphingobacteriia      | NA    | NA    | 0.036 | 0.03  | 0.029 | NA    | NA    | 0.069 |  |  |
| c__Synechococcophycideae | NA    | NA    | NA    | NA    | NA    | 0.419 | 0.133 | NA    |  |  |
| c__Verrucomicrobiae      | NA    | 0.04  | 0.057 | NA    | NA    | NA    | 0.026 | NA    |  |  |
| Other                    | 0.149 | 0.097 | 0.084 | 0.13  | 0.064 | 0.056 | 0.07  | 0.107 |  |  |

**Table S10. Fungal amplicon (ITS) phylum level taxonomy of microbiomes at the end of the laboratory experiment. Column headings are defined in table [S9](#).**

| Phylum     | AC.AT | AC.ET | EC.AT | EC.ET |
|------------|-------|-------|-------|-------|
| Ascomycota | 1.00  | 1.00  | 0.99  | 1.00  |
| Other      | 0.00  | 0.00  | 0.01  | 0.00  |

**Table S11. Fungal (ITS) class level taxonomy of microbiomes at the end of the laboratory experiment. Column headings are defined in table S9. Fungal classes not detected in samples are indicated with 'NA'.**

| Class           | AC.AT | AC.ET | EC.AT | EC.ET |
|-----------------|-------|-------|-------|-------|
| Dothideomycetes | 0.06  | 0.03  | 0.31  | NA    |
| Leotiomycetes   | 0.93  | 0.26  | 0.47  | 0.99  |
| Sordariomycetes | NA    | 0.71  | 0.20  | NA    |
| Other           | 0.01  | 0.00  | 0.03  | 0.01  |

**Table S12. Descriptive statistics and log2 fold change of metagenome assembled genomes (MAG). Marker lineage, completeness, contamination, and strain heterogeneity were calculated using checkM. Log2 fold change between warming and ambient metagenomic samples were determined by mapping reads metagenomic reads back to MAGs using BAMM and calculating counts per million mapped reads.**

| Bin Id  | Marker lineage                   | Completeness | Contamination | Strain heterogeneity | Warm reads/million | Ambient reads/million | log2FC (warm/ambient) |
|---------|----------------------------------|--------------|---------------|----------------------|--------------------|-----------------------|-----------------------|
| bin.354 | p__Cyanobacteria (UID2189)       | 98.22        | 0             | 0                    | 2478.68            | 0.27                  | 13.18                 |
| bin.259 | k__Bacteria (UID2982)            | 97.97        | 0.68          | 0                    | 0.45               | 1420.09               | -11.61                |
| bin.156 | p__Bacteroidetes (UID2605)       | 94.77        | 0.27          | 66.67                | 0.55               | 818.74                | -10.53                |
| bin.104 | p__Bacteroidetes (UID2605)       | 92.42        | 2.1           | 10                   | 3.33               | 1210.89               | -8.51                 |
| bin.192 | p__Cyanobacteria (UID2193)       | 88.92        | 0.84          | 0                    | 1674.53            | 5.91                  | 8.15                  |
| bin.99  | o__Burkholderiales (UID4000)     | 98.3         | 2.1           | 18.18                | 1165.13            | 8.18                  | 7.15                  |
| bin.287 | k__Bacteria (UID2982)            | 88.68        | 0.68          | 0                    | 312.60             | 3.67                  | 6.41                  |
| bin.23  | k__Bacteria (UID3187)            | 93.41        | 3.42          | 28.57                | 71.84              | 3560.88               | -5.63                 |
| bin.15  | p__Bacteroidetes (UID2605)       | 93.79        | 2.94          | 33.33                | 1844.19            | 37.42                 | 5.62                  |
| bin.184 | k__Bacteria (UID3187)            | 83.1         | 1.71          | 50                   | 695.57             | 14.82                 | 5.55                  |
| bin.56  | k__Bacteria (UID3187)            | 91.64        | 4             | 42.86                | 35.34              | 1541.88               | -5.45                 |
| bin.309 | o__Burkholderiales (UID4002)     | 96.81        | 2.12          | 55.56                | 72.21              | 2529.74               | -5.13                 |
| bin.47  | k__Bacteria (UID3187)            | 90.8         | 3.45          | 20                   | 42.94              | 1476.55               | -5.10                 |
| bin.81  | k__Bacteria (UID203)             | 73.28        | 2.59          | 100                  | 86.65              | 2811.99               | -5.02                 |
| bin.292 | k__Bacteria (UID203)             | 75           | 1.72          | 100                  | 21.23              | 648.77                | -4.93                 |
| bin.17  | o__Rhodospirillales (UID3754)    | 94.96        | 1.62          | 50                   | 144.65             | 3359.09               | -4.54                 |
| bin.121 | c__Alphaproteobacteria (UID3422) | 94.64        | 5             | 13.64                | 57.94              | 1116.78               | -4.27                 |
| bin.167 | f__Bradyrhizobiaceae (UID3695)   | 93.76        | 3.89          | 40.91                | 336.88             | 3913.99               | -3.54                 |
| bin.313 | o__Burkholderiales (UID4000)     | 78.47        | 2.66          | 38.46                | 629.98             | 61.81                 | 3.35                  |
| bin.59  | k__Bacteria (UID2982)            | 94.59        | 0.68          | 0                    | 59.45              | 509.63                | -3.10                 |
| bin.298 | k__Bacteria (UID2982)            | 70.78        | 1.91          | 0                    | 173.80             | 22.14                 | 2.97                  |
| bin.229 | o__Rhodospirillales (UID3754)    | 92.89        | 3.69          | 52.94                | 123.26             | 929.91                | -2.92                 |
| bin.72  | p__Bacteroidetes (UID2591)       | 77.35        | 1.48          | 0                    | 520.27             | 70.11                 | 2.89                  |
| bin.14  | p__Cyanobacteria (UID2189)       | 99           | 0.63          | 0                    | 399.29             | 2790.31               | -2.80                 |
| bin.79  | o__Rhizobiales (UID3654)         | 84.7         | 3.33          | 57.14                | 604.69             | 92.00                 | 2.72                  |
| bin.221 | o__Rhizobiales (UID3654)         | 97.44        | 4.23          | 70.59                | 155.60             | 958.54                | -2.62                 |
| bin.33  | c__Gammaproteobacteria (UID4202) | 89.23        | 4.73          | 38.1                 | 483.01             | 2753.98               | -2.51                 |
| bin.120 | c__Betaproteobacteria (UID3888)  | 88.46        | 1.33          | 0                    | 208.76             | 1131.76               | -2.44                 |
| bin.208 | o__Rhodospirillales (UID3754)    | 76.88        | 2.99          | 77.78                | 1000.52            | 204.32                | 2.29                  |
| bin.326 | k__Bacteria (UID2982)            | 99.27        | 4.26          | 40                   | 1456.93            | 320.12                | 2.19                  |
| bin.31  | k__Bacteria (UID203)             | 80.17        | 0             | 0                    | 2016.91            | 8598.72               | -2.09                 |
| bin.302 | o__Rhodospirillales (UID3754)    | 98.64        | 4.34          | 71.43                | 1493.89            | 556.02                | 1.43                  |
| bin.255 | p__Bacteroidetes (UID2591)       | 86.59        | 2.73          | 11.11                | 260.69             | 503.76                | -0.95                 |
| bin.189 | o__Rhodospirillales (UID3754)    | 95.32        | 3.24          | 45.45                | 705.99             | 1259.43               | -0.84                 |
| bin.265 | k__Bacteria (UID1453)            | 97.29        | 3.99          | 0                    | 580.23             | 1011.39               | -0.80                 |
| bin.286 | c__Alphaproteobacteria (UID3305) | 93.01        | 1.02          | 33.33                | 387.08             | 234.46                | 0.72                  |
| bin.247 | c__Gammaproteobacteria (UID4202) | 96.46        | 3.83          | 33.33                | 629.26             | 964.26                | -0.62                 |
| bin.243 | k__Bacteria (UID2982)            | 93.68        | 0.68          | 0                    | 881.61             | 603.55                | 0.55                  |
| bin.202 | o__Rhodospirillales (UID3754)    | 92.42        | 0.72          | 33.33                | 688.67             | 501.22                | 0.46                  |
| bin.289 | k__Bacteria (UID2495)            | 83.15        | 1.12          | 100                  | 294.65             | 219.73                | 0.42                  |
| bin.92  | o__Rhodospirillales (UID3754)    | 99.1         | 1.41          | 20                   | 1088.07            | 920.00                | 0.24                  |
| bin.257 | k__Bacteria (UID2982)            | 85.62        | 6.4           | 37.5                 | 1098.88            | 958.34                | 0.20                  |
| bin.339 | k__Bacteria (UID3187)            | 88.7         | 2.78          | 42.86                | 1750.25            | 1985.11               | -0.18                 |
| bin.132 | p__Bacteroidetes (UID2605)       | 93.04        | 3.25          | 55.56                | 686.18             | 613.76                | 0.16                  |
| bin.223 | o__Rhodospirillales (UID3754)    | 92.83        | 4.81          | 7.69                 | 550.96             | 579.56                | -0.07                 |
| bin.198 | o__Actinomycetales (UID1593)     | 98.48        | 2.27          | 40                   | 624.26             | 609.67                | 0.03                  |

**Table S13. Number of paired-end metatranscriptomic reads passing quality control. Quality trimming was performed at the Q20 level and if either read of a pair was <75 bp after adapter removal and quality trimming the read pair was discarded.**

| Chamber      | Microbiome | Rep | Counts of paired-end reads passing QC | Plant Reads   | Bacterial/Archaeal reads | Fungal Reads |
|--------------|------------|-----|---------------------------------------|---------------|--------------------------|--------------|
| Ambient      | Ambient    | 1   | 49,339,226                            | 35524243      | 8880173                  | 887          |
|              | Ambient    | 2   | 35,987,608                            | 20872813      | 8995462                  | 1431         |
|              | Ambient    | 3   | 39,865,568                            | 25513964      | 10363804                 | 1245         |
| Ambient      | Warming    | 1   | 33,372,123                            | 20690716      | 7674667                  | 1021         |
|              | Warming    | 2   | 31,528,203                            | 23015588      | 6620128                  | 788          |
|              | Warming    | 3   | 41,055,820                            | 25044050      | 8210179                  | 991          |
| Ambient      | Control    | 1   | 29,530,155                            | 25395933      | 3543193                  | 433          |
|              | Control    | 2   | 37,222,244                            | 31638907      | 4838311                  | 582          |
|              | Control    | 3   | 31,634,008                            | 27205247      | 4111928                  | 483          |
| Warming      | Ambient    | 1   | 56,084,411                            | 5608441       | 8379011                  | 1716199      |
|              | Ambient    | 2   | 48,673,151                            | 7300973       | 8620015                  | 2574810      |
|              | Ambient    | 3   | 42,032,880                            | 4623617       | 11008411                 | 340461       |
| Warming      | Warming    | 1   | 46,801,800                            | 31825224      | 6083504                  | 733          |
|              | Warming    | 2   | 35,071,333                            | 18587806      | 4909397                  | 589          |
|              | Warming    | 3   | 41,731,001                            | 24203981      | 5424379                  | 661          |
| Warming      | Control    | 1   | 45,655,644                            | 39263854      | 5660621                  | 683          |
|              | Control    | 2   | 49,482,126                            | 42059807      | 5991566                  | 719          |
|              | Control    | 3   | 41,676,823                            | 35842068      | 5000619                  | 605          |
| <b>Total</b> |            |     |                                       | <b>60.29%</b> | <b>16.87%</b>            | <b>0.63%</b> |

**Table S14. Log2 fold change of SEED subsystem level 3 gene ontologies for the microbial fraction of metatranscriptomic reads. Read mapping and feature counts were determined using the SAMSA pipeline and differential expression analysis was performed with limma-voom. Abbreviations are defined as ambient chamber/ambient temperature conditioned microbiome (ACAM), +9C chamber/ambient temperature conditioned microbiome (9CAM), Ambient chamber/+9C temperature conditioned microbiome (AC9M), +9C chamber/+9C temperature conditioned microbiome (9C9M) and, avg(9M) which indicates the average of 9C9M and AC9M. Non-significant comparisons are indicated with 'ns'.**

| SEED L3 Classification                                    | log2(9CAM/ACAM) | log2(9C9M/AC9M) | log2(avg(9M)/ACAM) |
|-----------------------------------------------------------|-----------------|-----------------|--------------------|
| <b>Nitrogen Metabolism</b>                                |                 |                 |                    |
| Allantoin Utilization                                     | -2.43           | NS              | NS                 |
| Amidase clustered                                         | -1.73           | NS              | -1.14              |
| Ammonia assimilation                                      | 2.78            | NS              | NS                 |
| Nitrate/nitrite ammonification                            | 2.62            | NS              | NS                 |
| Nitric_oxide_synthase                                     | -1.55           | NS              | NS                 |
| Nitrogen_fixation                                         | -5.74           | NS              | -7.99              |
| Nitrosative_stress                                        | 1.85            | NS              | NS                 |
| Heterocyst cyanobacteria                                  | -2.01           | -1.64           | -8.64              |
| <b>Sulfur Metabolism</b>                                  |                 |                 |                    |
| Sulfur_oxidation                                          | 2.91            | NS              | 2.27               |
| Taurine_Utilization                                       | NS              | NS              | 1.70               |
| Glutathione as Sulphur source                             | 1.69            | NS              | 2.51               |
| Galactosylceramid/Sulfatide_metabolism                    | -2.55           | NS              | NS                 |
| Inorganic_Sulfur_Assimilation                             | 1.03            | NS              | NS                 |
| <b>Stress</b>                                             |                 |                 |                    |
| Universal_stress_protein_family                           | 2.41            | NS              | -1.70              |
| GroEL_GroES                                               | 1.39            | NS              | NS                 |
| Heat_shock_dnaK_gene_cluster                              | 1.50            | NS              | NS                 |
| <b>Photo/Cyano</b>                                        |                 |                 |                    |
| Cyanobacterial_Circadian_Clock                            | 1.03            | NS              | -4.39              |
| Myxoxanthophyll biosynthesis Cyanobacteria                | 1.72            | 2.54            | -7.55              |
| Bacterial_light-harvesting_protein                        | NS              | 4.42            | NS                 |
| Bacteriorhodopsin                                         | -1.05           | NS              | NS                 |
| PSII-type reaction_center                                 | -1.31           | 2.85            | NS                 |
| Photosystem_I                                             | 1.84            | NS              | NS                 |
| Photosystem_II                                            | 1.11            | NS              | NS                 |
| Phycobilisome                                             | 1.75            | NS              | -8.89              |
| <b>One Carbon Metabolism</b>                              |                 |                 |                    |
| Formaldehyde_assimilation:_Ribulose_monophosphate_pathway | -1.24           | NS              | NS                 |
| One-carbon_metabolism_by_tetrahydropterines               | NS              | NS              | 1.98               |
| Serine-glyoxylate_cycle                                   | NS              | NS              | NS                 |
| Soluble_methane_monooxygenase                             | -2.66           | NS              | NS                 |



## Methods S1: Metagenome and sequence analysis Metagenomics of the starting inoculum

DNA for metagenomics was extracted using a modified CTAB method (Carrell & Frank, 2014). The ambient- and warming-conditioned microbiome samples were sequenced as an Illumina TruSeq PCR-Free library on an Illumina 2500 in Rapid Run mode (paired-end,  $2 \times 150$  nt). Raw sequences were processed using Atropos v. 1.1.17 (Didion *et al.*, 2017) in Python v3.6.2 to remove adapter contamination and quality trimming. Quality trimming was performed at the Q20 level with read pairs, and if either read of a pair was  $< 75$  bp after adapter removal and quality trimming, the read pair was discarded. Before metagenome assembly, we removed reads mapping to either the *S. angustifolium* or PhiX genomes using bbmap v38.22. The remaining metagenome reads for the ambient and warming samples were co-assembled using MEGAHIT v1.1.3 (Li *et al.*, 2015, 2016) with default settings except `--min-contig-len` was set to 300. Trimmed paired-end reads were mapped to the MEGAHIT co-assembly with BamM v1.7.3 (<http://ecogenomics.github.io/BamM/>) (Li & Durbin, 2009). Putative genomes were binned from the co-assembled contigs using MetaBAT v2.12.1 (Kang *et al.*, 2019) with `--minContig` set to 2000. Metagenome-assembled genomes (MAGs) were assessed for completeness, contamination, and strain contamination using checkM v1.0.12 (Parks *et al.*, 2015). MAGs that were  $\geq 70\%$  complete with  $\leq 5\%$  contamination were kept for downstream analyses. To determine differences in the relative abundance of MAGs between ambient and warming metagenome samples, trimmed metagenomic reads were mapped to MAGs using BamM v.1.7.3 and normalized as counts per million mapped reads. Gene models were predicted for the co-assembled metagenomic contigs using Prodigal v2.6.3 (Hyatt *et al.*, 2010) in anonymous mode, and MAGs were annotated using prokka v1.14.0 (Seemann, 2014). Taxonomy was assigned to gene models using the lowest common ancestor algorithm implemented in DIAMOND v0.9.22 (Buchfink *et al.*, 2014). Inferred amino acid sequences were searched against the NCBI non-redundant protein database (downloaded October 3, 2019) using default settings in DIAMOND BLASTp except as follows: `--query-cover 85`, `--top 5`, and `--sensitive`.

### Phylogenetic analysis of cyanobacterial MAGs

We downloaded 109 cyanobacterial RefSeq genomes from NCBI representing the currently sequenced diversity of clade A (*Oscillatoria/Arthrospira*) and clade B (*Nostoc/Anabaena/Cyanothece*), following the nomenclature of (Shih *et al.*, 2013), and two outgroup taxa, *Acaryochloris* sp. CCMEE 5410 and *A. marina* MBIC11017. Additionally, we included six cyanobacterial isolates sequenced in (Warshan *et al.*, 2017), *Nostoc moss6*, *N. moss3*, *N. moss2*, *N. moss4*, *N. moss5*, and *N. sp. 996*, six MAGs from our metagenomic assembly labeled bin14, bin192, bin238, bin354, bin377, and bin384, three binned genomes from the SPRUCE site, but outside the enclosures labeled bin109, bin297, and bin367, and one newly sequenced genome for *Nostoc muscorum*. A concatenated alignment of inferred amino acid sequences from 31 proteins for the 125 cyanobacterial genomes

was generated and trimmed using the AMPORA2 pipeline (Wu & Scott, 2012). Alignment sites containing only gaps and ambiguous characters were removed using FAST v1.6. Molecular evolution model selection was performed with ModelFinder (Kalyaanamoorthy *et al.*, 2017). Phylogenetic analysis was conducted with IQ-TREE v1.6.8 (Minh *et al.*, 2013) using the cpREV+C60+F+R6 model. Node support was evaluated using 1000 SH-like approximate likelihood ratio test replicates and 1000 UFboot2 replicates (Minh *et al.*, 2013).

#### References:

- Buchfink B, Xie C, Huson DH. 2014.** Fast and sensitive protein alignment using DIAMOND. *Nature Methods* **12**: 59–60.
- Carrell AA, Frank AC. 2014.** *Pinus flexilis* and *Picea engelmannii* share a simple and consistent needle endophyte microbiota with a potential role in nitrogen fixation. *Frontiers in Microbiology* **5**: 1–11.
- Didion JP, Martin M, Collins FS. 2017.** Atropos: Specific, sensitive, and speedy trimming of sequencing reads. *PeerJ* **2017**: 1–19.
- Hyatt D, Chen G-L, Locascio PF, Land ML, Larimer FW, Hauser LJ. 2010.** Prodigal: prokaryotic gene recognition and translation initiation site identification. *BMC Bioinformatics* **11**: 119.
- Kalyaanamoorthy S, Minh BQ, Wong TKF, Von Haeseler A, Jermiin LS. 2017.** ModelFinder: Fast model selection for accurate phylogenetic estimates. *Nature Methods* **14**: 587–589.
- Kang DD, Li F, Kirton E, Thomas A, Egan R, An H, Wang Z. 2019.** MetaBAT 2: an adaptive binning algorithm for robust and efficient genome reconstruction from metagenome assemblies. *PeerJ* **7**: e7359.
- Li H, Durbin R. 2009.** Fast and accurate short read alignment with Burrows-Wheeler transform. **25**: 1754–1760.
- Li D, Liu CM, Luo R, Sadakane K, Lam TW. 2015.** MEGAHIT: An ultra-fast single-node solution for large and complex metagenomics assembly via succinct de Bruijn graph. *Bioinformatics* **31**: 1674–1676.
- Li D, Luo R, Liu CM, Leung CM, Ting HF, Sadakane K, Yamashita H, Lam TW. 2016.** MEGAHIT v1.0: A fast and scalable metagenome assembler driven by advanced methodologies and community practices. *Methods* **102**: 3–11.
- Minh BQ, Anh M, Nguyen T, Von Haeseler A. 2013.** Ultrafast approximation for phylogenetic bootstrap. *Molecular Biology and Evolution* **30**:1188-95.
- Parks DH, Imelfort M, Skennerton CT, Hugenholtz P, Tyson GW. 2015.** CheckM: Assessing the quality of microbial genomes recovered from isolates, single cells, and metagenomes. *Genome Research* **25**: 1043–1055.

**Seemann T. 2014.** Genome analysis Prokka: rapid prokaryotic genome annotation. **30**: 2068–2069.

**Shih PM, Wu D, Latifi A, Axen SD, Fewer DP, Talla E, Calteau A, Cai F, Tandeau De Marsac N, Rippka R, et al. 2013.** Improving the coverage of the cyanobacterial phylum using diversity-driven genome sequencing. *Proceedings of the National Academy of Sciences of the United States of America* **110**: 1053–1058.

**Warshan D, Espinoza JL, Stuart RK, Richter RA, Kim S-Y, Shapiro N, Woyke T, C Kyrpides N, Barry K, Singan V, et al. 2017.** Feather-moss and epiphytic *Nostoc* cooperate differently: expanding the spectrum of plant–cyanobacteria symbiosis. *The ISME Journal* **11**: 2821–2833.

**Wu M, Scott AJ. 2012.** Phylogenomic analysis of bacterial and archaeal sequences with AMPHORA2. *Bioinformatics Application Note* **28**: 1033–1034.

**Available as separate files:**

**SI Dataset S1 (SI\_dataset.xlsx)**

Significantly enriched MapMan4 gene ontologies for Sphagnum mapped metatranscriptome reads. Statistical significance (padj) of ontology bins was determined using Kruskal–Wallis test with multiple testing correction performed using FDR. Average log<sub>2</sub> fold change (avg\_lfc) of MapMan4 bins was determined by averaging log<sub>2</sub> fold change across differentially expressed genes. Up/down indicates the number of genes within the bin significantly upregulated (left of slash) and downregulated (right of slash). Differential gene expression was determined using limma-voom and considered significant if the FDR corrected p-value was  $\leq 0.05$ . Remaining abbreviation defined in Table S7.

**SI Dataset S2 (SI\_dataset.xlsx)**

Significantly enriched SEED gene ontologies for microbial mapped metatranscriptome reads. Statistical significance (padj) was determined using Kruskal–Wallis test with multiple testing correction performed using FDR. Average log<sub>2</sub> fold change (avg\_lfc) was determined by averaging log<sub>2</sub> fold change across differentially expressed genes. Differential gene expression was determined using limma-voom and considered significant if the FDR corrected p-value was  $\leq 0.05$ .
